# Supplementary material for: Surface modification of magnetic nanoparticles via admicellar polymerization for selective removal of tetracycline from real water samples
Source: Royal Society of Chemistry journal article supplement (doi:10.1039/d1nj00494h), 2021-01-01
Supplement: d1nj00494h1.pdf [file d1nj00494h1.pdf]

## Supporting Data

*for*

### Surface modification of magnetic nanoparticles via admicellar polymerization for selective removal of tetracycline from real water samples

Meshude Akbulut Söylemez<sup>a,b,\*</sup>, Berk Öztürk Kemaloğulları<sup>b</sup>

*Hacettepe University, Department of Chemistry, Beytepe, Ankara, 06800 Turkey*

*Institute of Science, Polymer Science and Technology Division Hacettepe University, Beytepe, Ankara,  
06800 Turkey*

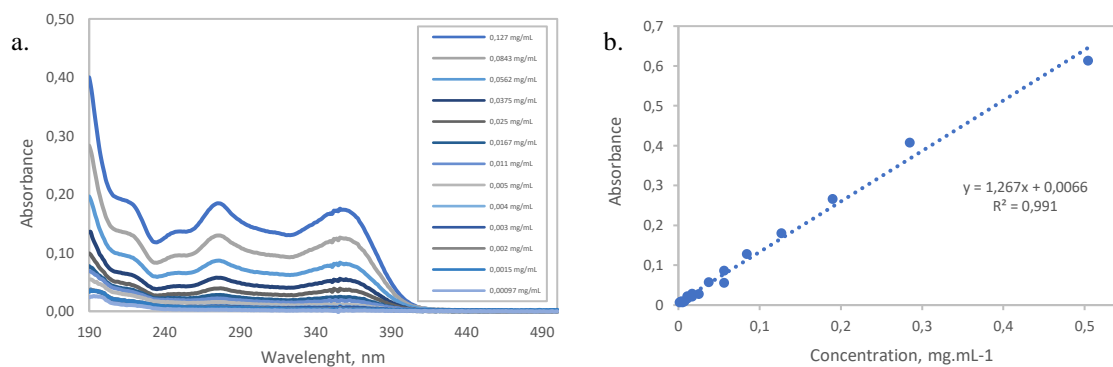

**Figure S1.** (a) The UV-Visible spectrum of tetracycline in the water at pH 7 and (b) the calibration curve.

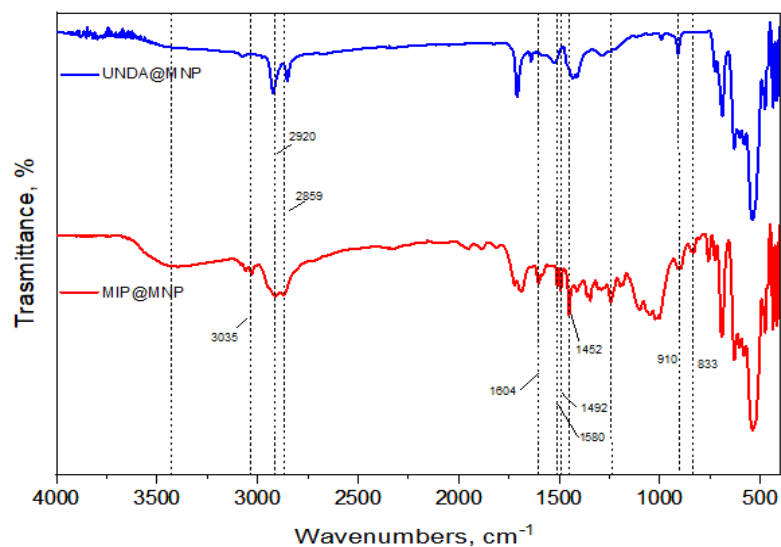

**Figure S2.** FTIR spectra of magnetic  $\text{Fe}_2\text{O}_3$  nanoparticles (MNP), UNDA and MNP after modification with UNDA (UNDA@MNP).

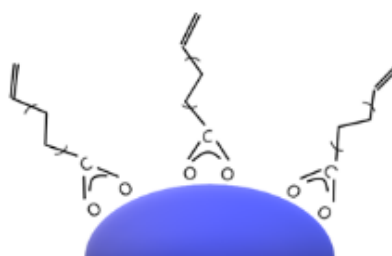

**Figure S3.** Chelating bidentate interaction between the carboxylate group of UNDA and the iron atom.

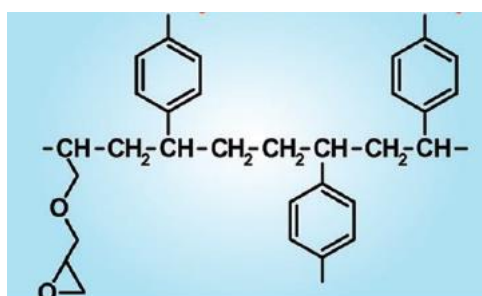

**Figure S4.** Chemical structure of STY-DVB-GMA.

The stability of the UNDA@MNP was checked by shacking at 70 °C for 16 h.

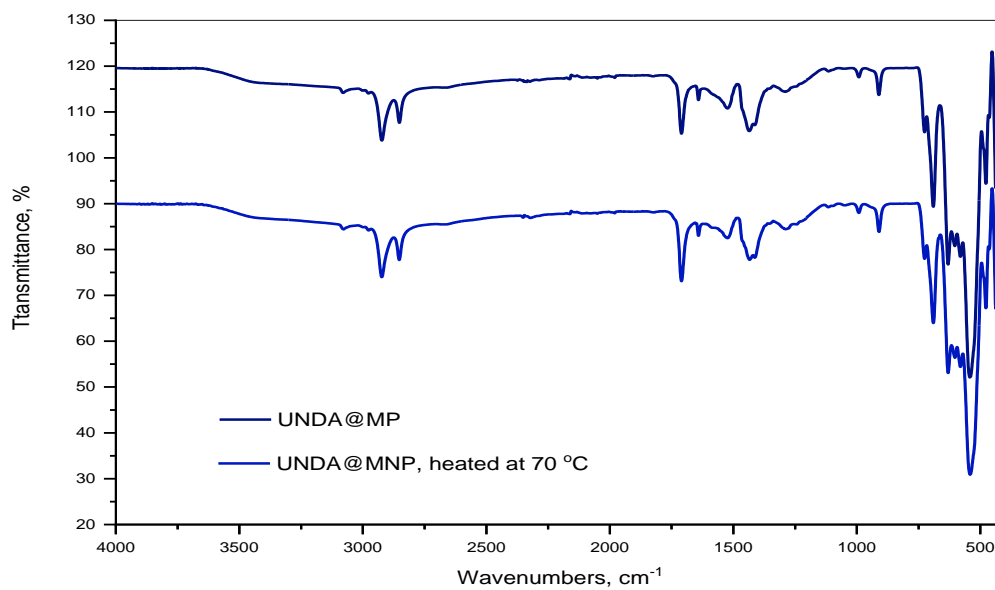

**Figure S5.** FTIR spectra of UNDA@MNP before and after heated at 70 °C.

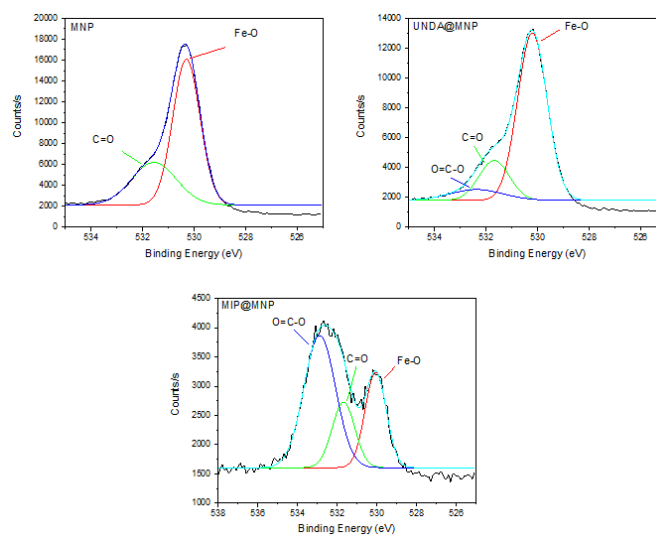

**Figure S6.** XPS O1s core level spectra of MNP, UNDA@MNP and MIP@MNP.

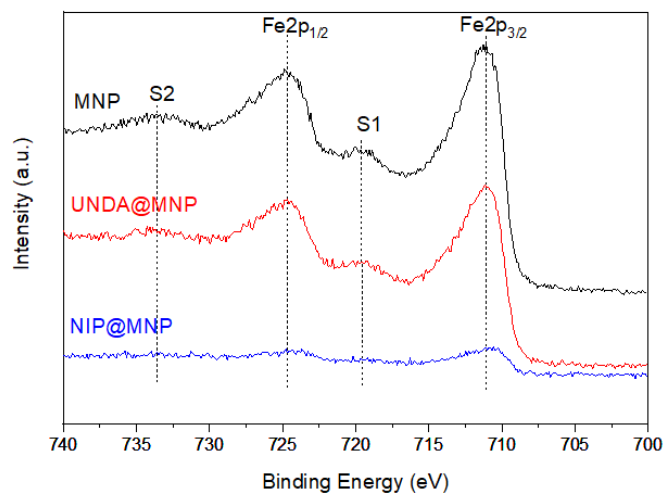

**Figure S7.** Fe2p core spectra of MNP before and after surface modification.

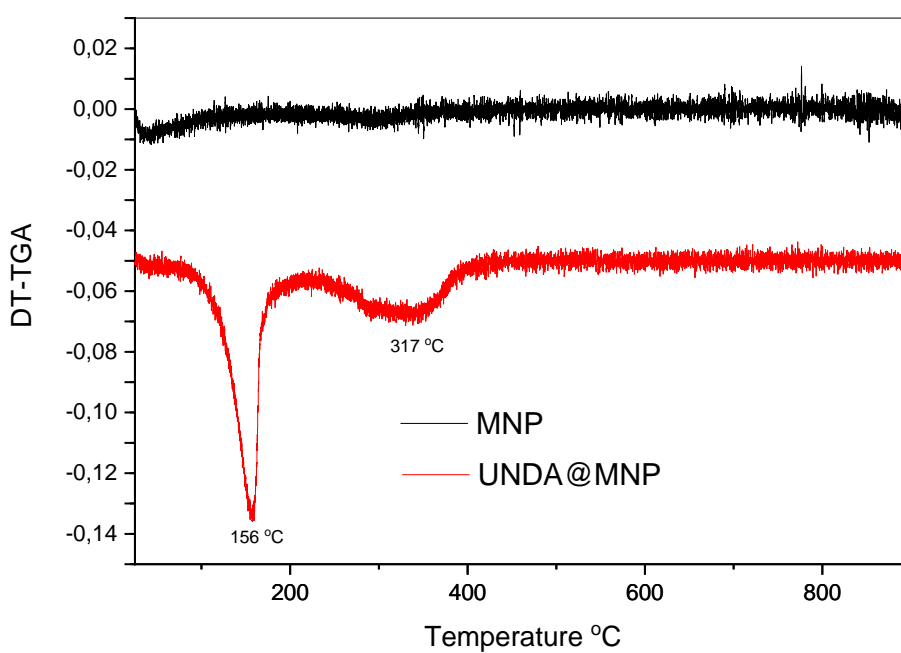

**Figure S8.** First derivation curve of MNP and UNDA@MNP.

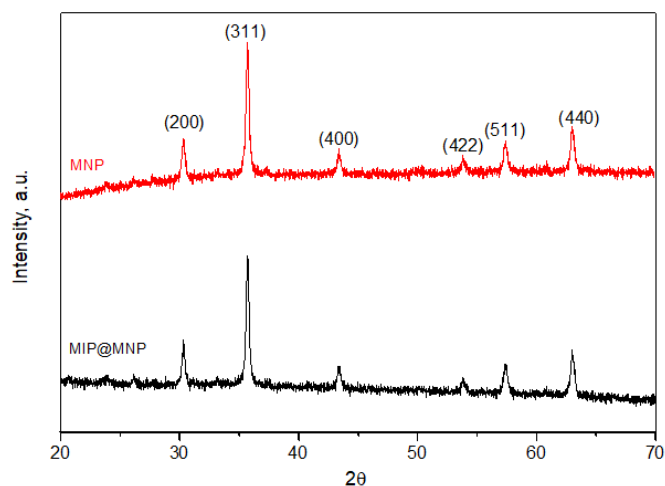

**Figure S9.** XRD pattern for  $\text{Fe}_2\text{O}_3$  magnetic nanoparticles (MNP) and MIP modified  $\text{Fe}_2\text{O}_3$  magnetic nanoparticles (MIP@MNP).

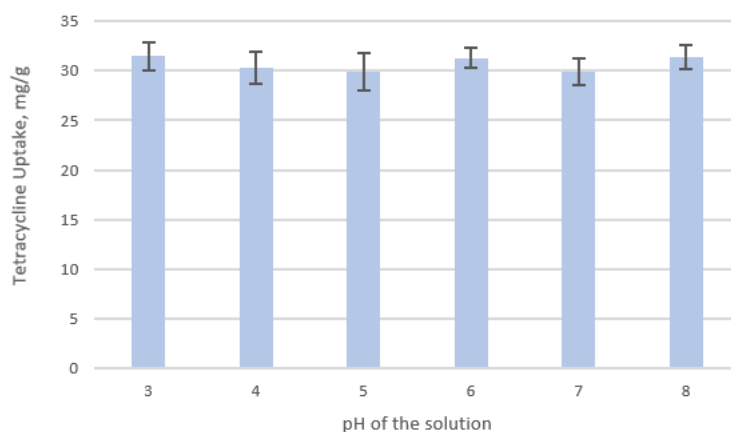

**Figure S10.** pH effect on the binding capacity of MIP@MNP (5.00 mg modified MIP@MNP in  $0.050 \text{ mg}\cdot\text{mL}^{-1}$  tetracycline solutions with different pH values. The incubation time was 60 min,  $n=3$ ).

15 mg of MIP@MNP was put into solutions of  $0.03 \text{ M KNO}_3$  adjusted at different pH values. The suspensions were shaken for 3 h in a shaker at 250 rpm until an equilibrium pH value was

reached. The changes in pH values ( $\Delta\text{pH}$ ) were determined. The  $\text{pH}_{\text{pzc}}$  was determined by using  $\Delta\text{pH}$  vs initial pH curve (Figure S11) [1].

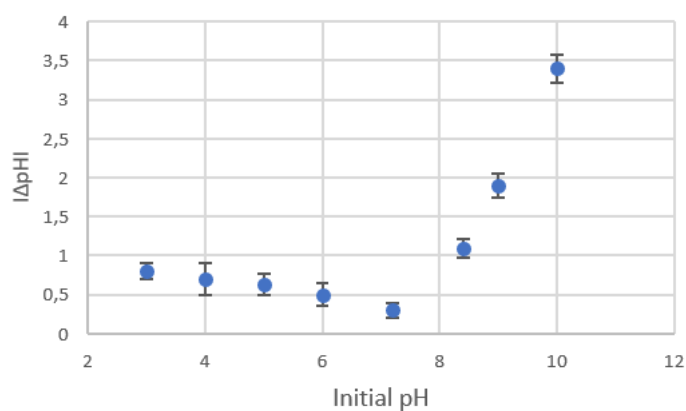

**Figure S11.** Experimental immersion technique curve for MIP@MNP.

[1] N. Fiol, I. Villaescusa, *Environ Chem Lett* 2009, **7**, 79–84.

Binding behaviours of MNP were investigated by employing binding isotherms. Bi-Langmuir and Freundlich models were used (Table S1). The obtained curves can be seen in Figure S6.

**Table S1** Isotherm models and related parameters used in this work.

| Isotherm                  | Equation                                                                | Parameters                                        |
|---------------------------|-------------------------------------------------------------------------|---------------------------------------------------|
| <b>Langmuir</b>           | $B = \frac{NKF}{1 + KF}$                                                | B, amount of bound analyte on imprinted network   |
| <b>Bi-Langmuir</b>        | $B = \frac{N_1 K_1 F_1}{1 + K_1 F_1} + \frac{N_2 K_2 F_2}{1 + K_2 F_2}$ | F, free concentration of analyte in solution      |
| <b>Scatchard Equation</b> | $\frac{B}{F} = KN - KB$                                                 | N, number of binding sites<br>K, binding constant |
| <b>Freundlich</b>         | $B = aF^m$                                                              | a, adsorption constant<br>m, heterogeneity index  |

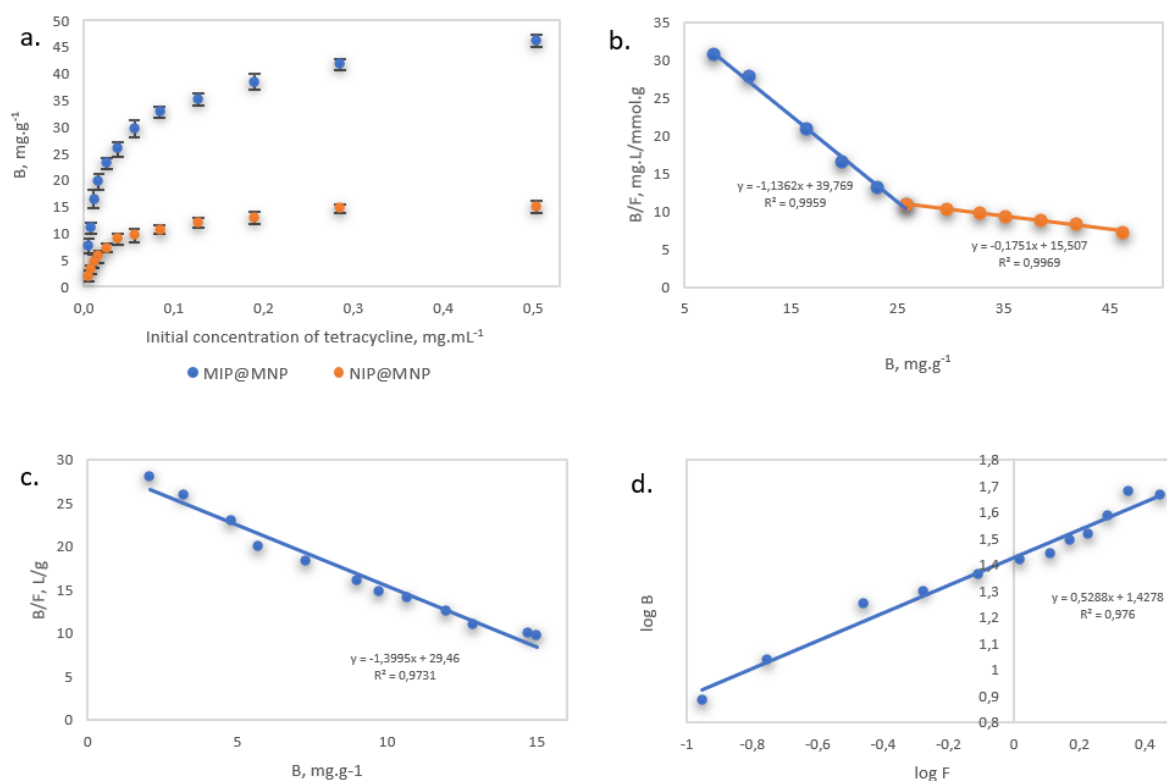

**Figure S12.** (a) The binding isotherms (b) Scatchard analysis plot of MIP@MNP and (c) NIP@MNP and (d) Freundlich plot of MIP@MNP (5.00 mg modified MNP, incubation time 35 min, pH: 7, n: 3).

**Table S2** Lagergren's 1<sup>st</sup> order and pseudo 2<sup>nd</sup> order rate equations and related parameters.

|                                          |                                                                                   |                                                                                                                      |
|------------------------------------------|-----------------------------------------------------------------------------------|----------------------------------------------------------------------------------------------------------------------|
| <i>Pseudo-First Order Kinetic Model</i>  | $\ln(q_e - q_t) = \ln(q_e) - k_1 t$                                               | $q_e$ , amount of the adsorbed analyte at equilibrium<br>$q_t$ , amount of the adsorbed analyte at time t<br>t, time |
| <i>Pseudo-Second Order Kinetic Model</i> | $\frac{t}{q_t} = \left(\frac{1}{k_2 q_e^2}\right) + \left(\frac{1}{q_e}\right) t$ | $k_1$ , pseudo-first order rate constant<br>$k_2$ , pseudo-second order rate constant                                |

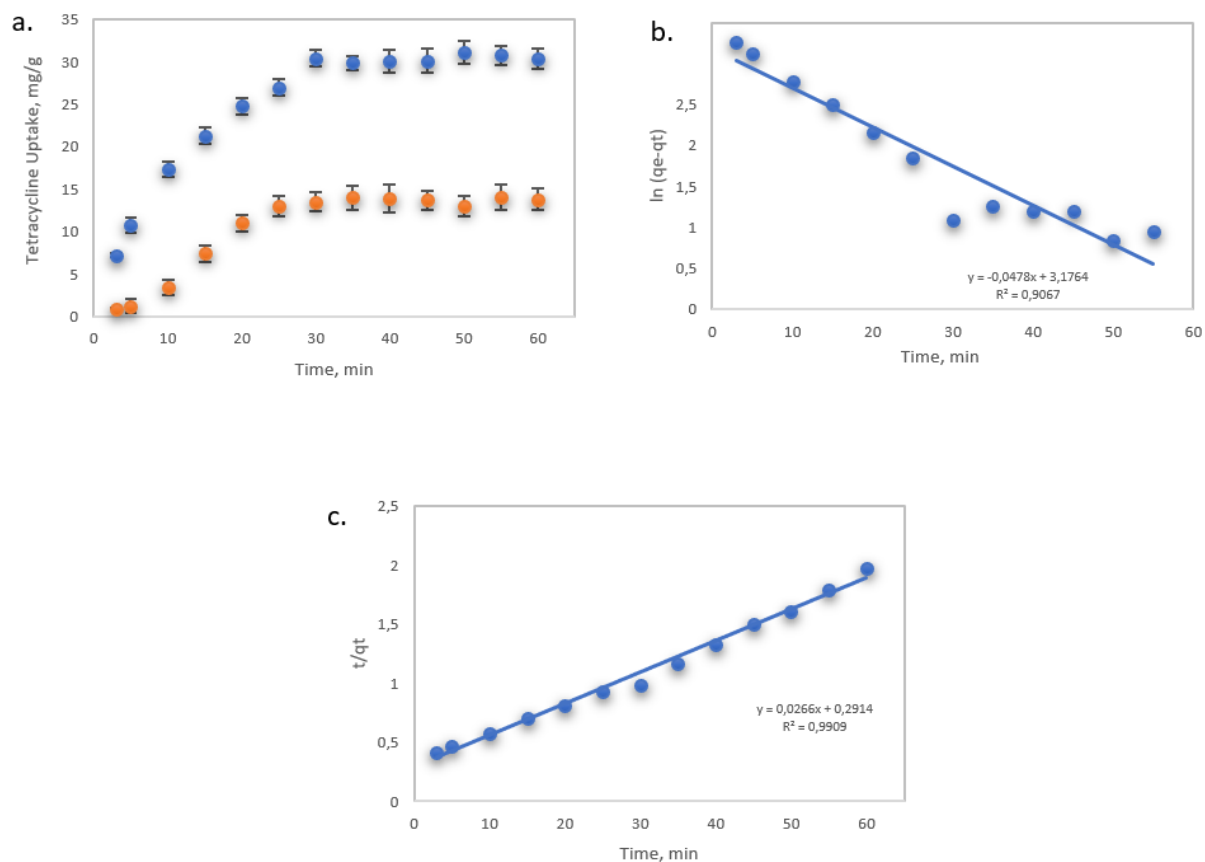

**Figure S13.** a) Change in adsorption of tetracycline with time, b) pseudo-1st-order and c) pseudo-2nd-order for MIP@MNP, respectively (amount of MIP@MNP: 5.00 mg, tetracycline concentration: 0.050 mg.mL<sup>-1</sup>, pH: 7, n: 3).

**Table S3** The rate constant,  $k$  and value of binding capacity at equilibrium,  $q_e$  for tetracycline binding onto MIP@MNP.

|                            |                                               |        |
|----------------------------|-----------------------------------------------|--------|
| <b>First-Order</b>         | $k_1$ (min <sup>-1</sup> )                    | 0.0478 |
|                            | $q_e$ (mg g <sup>-1</sup> )                   | 24.0   |
|                            | $R^2$                                         | 0.9067 |
| <b>Pseudo Second-Order</b> | $k_2$ (g mg <sup>-1</sup> min <sup>-1</sup> ) | 0.0024 |
|                            | $q_e$ (mg g <sup>-1</sup> )                   | 37.6   |
|                            | $R^2$                                         | 0.9909 |



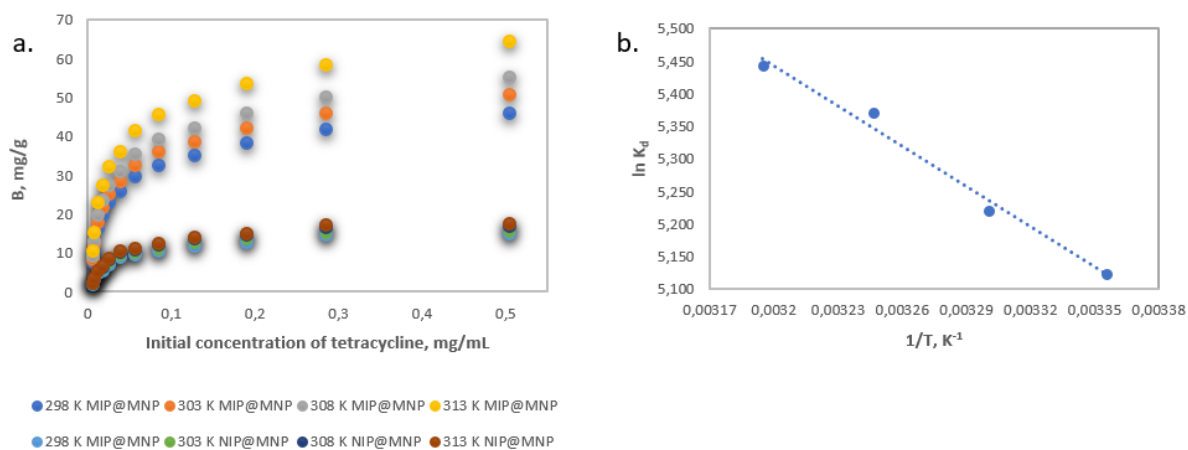

**Figure S14.** (a) Adsorption isotherms of tetracycline adsorption on MIP@MNP and NIP@MNP at different temperatures and (b) linear fitting curve of equilibrium constant ( $K_d$ ) versus temperature ( $\ln K_d$  versus  $1/T$ ) at 0.05 mg/mL of tetracycline concentration (pH: 7, incubation time: 35 min, n: 3).

**Table S4** Thermodynamic parameters for adsorption of tetracycline on MIP@MNP.

| Temperature (K) | K (L.g <sup>-1</sup> ) | ln K  | $\Delta G^0$ (kJ.mol <sup>-1</sup> ) | $\Delta H^0$ (kJ.mol <sup>-1</sup> ) | $\Delta S^0$ (J.mol <sup>-1</sup> K <sup>-1</sup> ) |
|-----------------|------------------------|-------|--------------------------------------|--------------------------------------|-----------------------------------------------------|
| 298             | 168                    | 5.124 | -12.70                               | 17.16                                | 100.2                                               |
| 303             | 185                    | 5.220 | -13.15                               |                                      |                                                     |
| 308             | 215                    | 5.371 | -13.75                               |                                      |                                                     |
| 313             | 231                    | 5.442 | -14.16                               |                                      |                                                     |

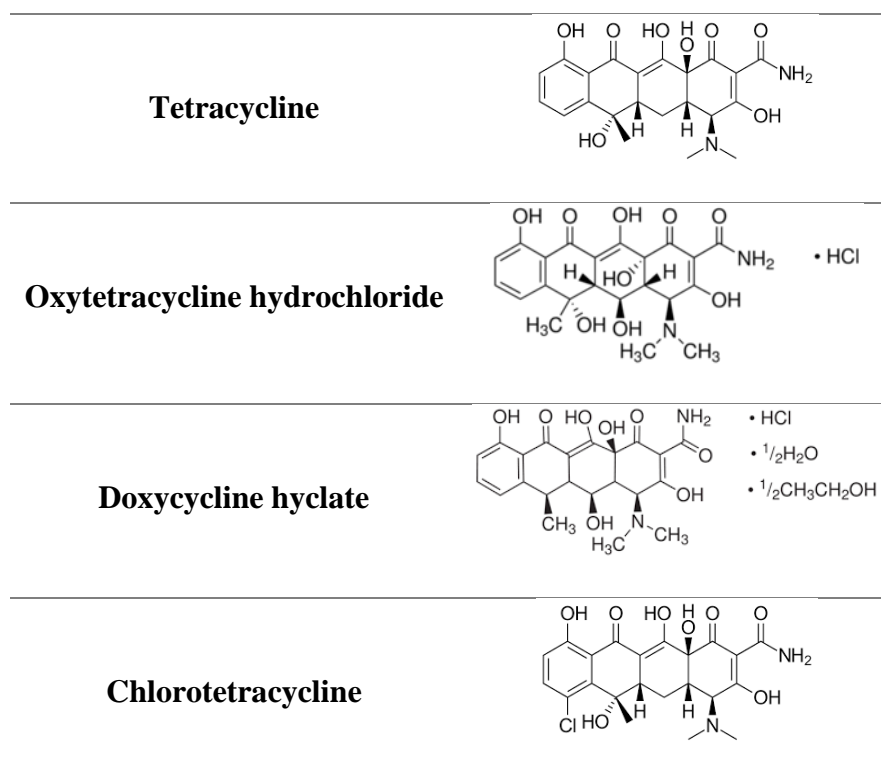

**Figure S15.** Chemical structures of tetracycline (TC) and oxytetracycline hydrochloride (OTC), doxycycline hyclate (DO), chlorotetracycline (CTC).

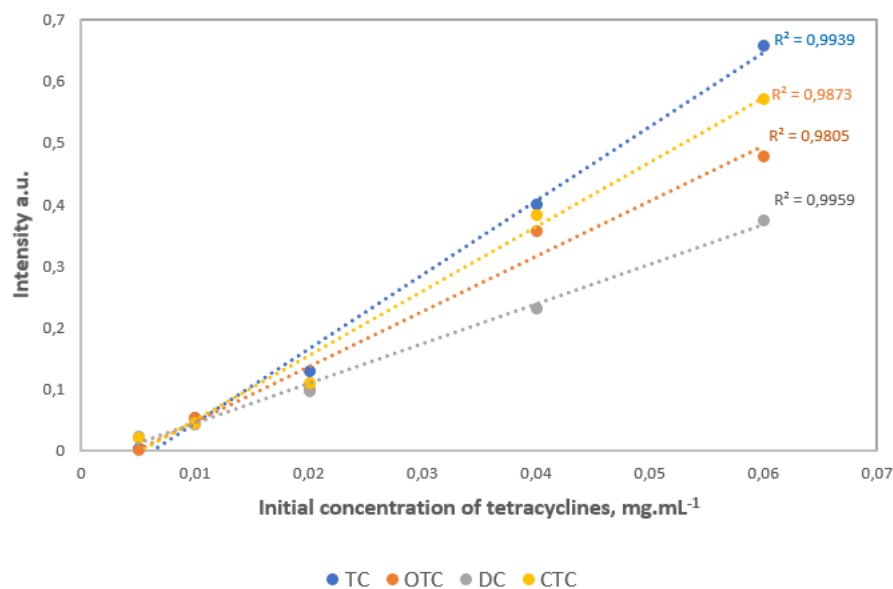

**Figure S16.** Calibration curves of tetracycline (TC) and oxytetracycline hydrochloride (OTC), doxycycline hyclate (DO), chlorotetracycline (CTC) obtained by HPLC.

**Table S5** Equations and related parameters for dissociation constant ( $K_d$ ), selectivity coefficient ( $k$ ) and relative selectivity coefficient ( $k'$ ).

|                                                           | <b>Equation</b>                                    | <b>Parameters</b>                                                                                                      |
|-----------------------------------------------------------|----------------------------------------------------|------------------------------------------------------------------------------------------------------------------------|
| <b>Dissociation Constant (<math>K_d</math>)</b>           | $K_d = \frac{(C_0 - C_f)}{C_f} \times \frac{V}{m}$ | $C_0$ Initial concentration of dye<br>$C_f$ Final concentration of dye                                                 |
| <b>Selectivity Coefficient (<math>k</math>)</b>           | $k = \frac{K_{dTetracycline}}{K_{dAntibiotic}}$    | $V$ volume of the solution<br>$M$ mass of the dry polymer                                                              |
| <b>Relative Selectivity Coefficient (<math>k'</math>)</b> | $k' = \frac{k_{MIM}}{k_{NIM}}$                     | $k_{MIM}$ Selectivity coefficient of imprinted membrane<br>$k_{NIM}$ Selectivity coefficient of non-imprinted membrane |

**Table S6** Dissociation constant ( $K_d$ ), selectivity coefficient ( $k$ ) and relative selectivity coefficient ( $k'$ ) of MIM.

|            | $K_{D, MIP}$ | $K_{D, NIP}$ | $k_{mp}$ | $k_{np}$ | $k'$ |
|------------|--------------|--------------|----------|----------|------|
| <b>TC</b>  | 14.9         | 4.4          |          |          |      |
| <b>OTC</b> | 10.6         | 6.8          | 1.41     | 0.64     | 2.20 |
| <b>DC</b>  | 11.2         | 7.4          | 1.33     | 0.59     | 2.24 |
| <b>CTC</b> | 6.05         | 4.9          | 2.45     | 0.89     | 2.76 |
